# Supplementary material for: Diabetes, Care Homes, and the Influence of Technology on Practice and Care Delivery in Care Homes: Systematic Review and Qualitative Synthesis
Source: PubMed Central journal article supplement (PMC6658297; doi:10.2196/11526), 2019-04-22
Supplement: diabetes_v4i2e11526_app2.pdf [file diabetes_v4i2e11526_app2.pdf]

## Appendix A. DATA EXTRACTION FORM

|                                                       |  |
|-------------------------------------------------------|--|
| Author<br>Study year                                  |  |
| Country                                               |  |
| Paper No.                                             |  |
| Study design                                          |  |
| Aim/ discussion                                       |  |
| Analysis                                              |  |
| Setting                                               |  |
| Group covered/<br>Participants                        |  |
| Type of technology<br>intervention                    |  |
| Key findings, planned or<br>actual effectiveness<br>1 |  |
| 2                                                     |  |
| 3                                                     |  |

|                            |                         |
|----------------------------|-------------------------|
| 4                          |                         |
| 5                          |                         |
| Authors comments           | Strengths<br>Weaknesses |
| Study Assessed Using ROBIS |                         |
